# Supplementary material
Source: PubMed Central journal article supplement (PMC2756288)
Supplement: NIHMS144031-supplement-Table_S1.pdf [file NIHMS144031-supplement-Table_S1.pdf]

**Rodriguez-Fernandez and Dell'Angelica  
Supplementary Table 1**

**A. Scoring criteria for candidate binding partners of human BLOC-1**

| Criteria & color | Definitions                                                                                                          |
|------------------|----------------------------------------------------------------------------------------------------------------------|
| <b>1</b>         | <b>Yeast-two-hybrid (Y2H) data</b>                                                                                   |
| Green            | Interaction from a small-scale Y2H screen or with high-confidence score from a large-scale Y2H project               |
| Yellow           | Medium-confidence score obtained in a large-scale Y2H project                                                        |
| <b>2</b>         | <b>Affinity-pulldown data</b>                                                                                        |
| Green            | Recombinant form of binding partner was able to pull-down native BLOC-1                                              |
| Yellow           | Recombinant form of binding partner was able to pull-down recombinant or overexpressed BLOC-1 subunit                |
| White            | No information                                                                                                       |
| <b>3</b>         | <b>Coimmunoprecipitation data</b>                                                                                    |
| Green            | Positive coimmunoprecipitation involving native BLOC-1                                                               |
| Yellow           | Coimmunoprecipitation involving overexpressed BLOC-1 subunit (epitope-tagged or not)                                 |
| White            | No information                                                                                                       |
| <b>4</b>         | <b>Predicted Coiled-coil domains</b>                                                                                 |
| Green            | Absence of predicted coiled-coil-forming domains                                                                     |
| Red              | Presence of predicted coiled-coil-forming domains                                                                    |
| <b>5</b>         | <b>Predicted transmembrane regions</b>                                                                               |
| Green            | Absence of predicted transmembrane regions                                                                           |
| Red              | Presence of predicted transmembrane regions                                                                          |
| <b>6</b>         | <b>Predicted structural or functional conserved domains</b>                                                          |
| Green            | Conserved domains specifically related to protein/membrane trafficking, such as FYVE, RAB, SNARE, BAR                |
| Yellow           | Conserved domains involved in multiple functions besides protein/membrane trafficking                                |
| Red              | Conserved domains with unrelated function, such as DNA or RNA binding                                                |
| White            | No conserved domains with known function                                                                             |
| <b>7</b>         | <b>mRNA expression patterns</b>                                                                                      |
| Green            | Transcript expressed in a wide variety of tissues and cell types                                                     |
| Yellow           | Transcript with restricted expression including brain (due to potential association of BLOC-1 with schizophrenia)    |
| Red              | Transcript with restricted expression not including brain tissue                                                     |
| <b>8</b>         | <b>Detection of a <i>D. melanogaster</i> homologue</b>                                                               |
| Green            | Positive detection of a homologue in <i>D. melanogaster</i> (with E-value $<10^{-4}$ )                               |
| Yellow           | Potential <i>D. melanogaster</i> homologue (E-value $>10^{-4}$ )                                                     |
| Red              | No <i>D. melanogaster</i> homologue detected on a BLASTP search                                                      |
| <b>9</b>         | <b>Detection of a <i>S. cerevisiae</i> homologue</b>                                                                 |
| Green            | No homologue detected in <i>S. cerevisiae</i> through BLASTP search                                                  |
| Yellow           | Homologue detected in <i>S. cerevisiae</i> (E-value $<10^{-4}$ ) with role in membrane/protein trafficking           |
| Red              | Homologue detected in <i>S. cerevisiae</i> (E-value $<10^{-4}$ ) with role unrelated to membrane/protein trafficking |
| <b>10</b>        | <b>Reported or proposed function</b>                                                                                 |
| Green            | Role in protein/membrane trafficking (vesicle-mediated transport) on endosomes or lysosomes                          |
| Yellow           | Role in protein/membrane trafficking but not necessarily on endosomes or lysosomes                                   |
| Red              | Unrelated function such as transcription or translation                                                              |
| White            | No information or multiple functions (e.g., cytoskeleton regulation)                                                 |

**Rodriguez-Fernandez and Dell'Angelica  
Supplementary Table 1**

**B. Scoring criteria for candidate binding partners of fly BLOC-1**

| Criteria & color | Definitions                                                                                        |
|------------------|----------------------------------------------------------------------------------------------------|
| <b>1</b>         | <b>Yeast-two-hybrid (Y2H) data</b>                                                                 |
| Green            | High-confidence score from a large-scale Y2H project (Confidence score > 0.66 on a 0-1 scale)      |
| Yellow           | Medium-confidence score from a large-scale Y2H project (Confidence score 0.33-0.66 on a 0-1 scale) |
| Red              | Low-confidence score from a large-scale Y2H project (Confidence score < 0.33 on a 0-1 scale)       |
| <b>2</b>         | <b>Predicted Coiled-coil domains</b>                                                               |
| Green            | Absence of predicted coiled-coil-forming domains (P-value << 0.5)                                  |
| Yellow           | Prediction for the coiled-coil domain not convincing (P-value ~ 0.5)                               |
| Red              | Presence of predicted coiled-coil-forming domains (P-value >> 0.5)                                 |
| <b>3</b>         | <b>Predicted transmembrane regions</b>                                                             |
| Green            | Absence of predicted transmembrane regions                                                         |
| Yellow           | Not convincing predicted transmembrane region (15-20 amino acid long)                              |
| Red              | Presence of predicted transmembrane regions (> 20 amino acid long)                                 |
| <b>4</b>         | <b>Predicted structural or functional conserved domains</b>                                        |
|                  | <i>Same as scoring criteria #6 for human BLOC-1 candidate binding partners</i>                     |
| <b>5</b>         | <b>Detection of a <i>H. sapiens</i> homologue</b>                                                  |
| Green            | Positive detection of a homologue in <i>H.sapiens</i> (with E-value <10 <sup>-4</sup> )            |
| Yellow           | Potential <i>H.sapiens</i> homologue (E-value >10 <sup>-4</sup> )                                  |
| Red              | No <i>H.sapiens</i> homologue detected on a BLASTP search                                          |
| <b>6</b>         | <b>Detection of a <i>S. cerevisiae</i> homologue</b>                                               |
|                  | <i>Same as scoring criteria #9 for human BLOC-1 candidate binding partners</i>                     |
| <b>7</b>         | <b>Candidates' reported or proposed function</b>                                                   |
|                  | <i>Same as scoring criteria #10 for human BLOC-1 candidate binding partners</i>                    |
| <b>8</b>         | <b>Candidates' reported or proposed function for the human homologue</b>                           |
|                  | <i>Same as scoring criteria #10 for human BLOC-1 candidate binding partners</i>                    |
