# Supplementary material
Source: PubMed Central journal article supplement (PMC2756288)
Supplement: NIHMS144031-supplement-Table_S2.pdf [file NIHMS144031-supplement-Table_S2.pdf]

**Rodriguez-Fernandez and Dell'Angelica  
Supplementary Table 2**

| Rank | Human Gene name | Chr. | Protein name (alternative name)               | Summary of reported/proposed function <sup>a</sup>         | Interacting BLOC-1 subunit | Reference (PMID) <sup>b</sup> |
|------|-----------------|------|-----------------------------------------------|------------------------------------------------------------|----------------------------|-------------------------------|
| 1    | <i>RAB11A</i>   | 15   | Rab11a                                        | GTPase, Protein/membrane trafficking, endosomes            | Dysbindin                  | 17043677                      |
| 2    | <i>PLEKHF2</i>  | 8    | Phafin 2                                      | Protein/membrane trafficking                               | Pallidin                   | 16189514                      |
| 3    | <i>NBEA</i>     | 13   | neurobeachin                                  | Protein/membrane trafficking, post-Golgi/endosomes         | Dysbindin                  | 17043677                      |
| 4    | <i>EXOC7</i>    | 17   | EXO70 (exocyst complex component 7)           | Protein/membrane trafficking, exocytosis                   | Snapin                     | 17947242                      |
| 5    | <i>SNAP23</i>   | 15   | SNAP-23                                       | Protein/membrane trafficking, membrane fusion              | Snapin                     | 12877659                      |
| 6    | <i>CSNK1D</i>   | 17   | casein kinase 1 delta (CK1delta)              | Protein kinase, multiple functions                         | Snapin, Dysbindin          | 17101137                      |
| 7    | <i>SNAP25</i>   | 20   | SNAP-25                                       | Protein/membrane trafficking, synaptic vesicle exocytosis  | Snapin                     | 10195194                      |
| 8    | <i>WASF2</i>    | 1    | WAS protein family, member 2                  | Cytoskeleton, actin binding                                | Dysbindin                  | AfCS                          |
| 9    | <i>EXOC8</i>    | 1    | exocyst complex 84-kDa subunit                | Protein/membrane trafficking, exocytosis                   | Pallidin                   | 16189514                      |
| 10   | <i>ZFYVE20</i>  | 3    | rabenosyn-5                                   | Protein/membrane trafficking, endosomes                    | Dysbindin                  | 17043677                      |
| 11   | <i>EXOC4</i>    | 7    | SEC8 protein (exocysts complex component 4)   | Protein/membrane trafficking, exocytosis                   | Dysbindin                  | 17043677                      |
| 12   | <i>STX12</i>    | 1    | syntaxin 13 (syntaxin 12, syntaxin 14)        | Protein/membrane trafficking, endosomes, fusion            | Pallidin                   | 10610180                      |
| 13   | <i>RANBP5</i>   | 13   | Ran binding protein (Karyopherin beta 3)      | Nucleocytoplasmic transport                                | Dysbindin                  | 17043677                      |
| 14   | <i>HTATIP</i>   | 11   | HIV-1 Tat interacting protein, 60kDa          | Chromatin remodeling, transcription, DNA repair            | Snapin                     | 16169070                      |
| 15   | <i>MYST2</i>    | 17   | MYST histone acetyltransferase 2              | Histone acetyltransferase, DNA replication                 | Snapin                     | 16169070                      |
| 16   | <i>AATF</i>     | 17   | apoptosis antagonizing transcription factor   | Transcription factor                                       | BLOS2                      | 17552904                      |
| 17   | <i>ARFIP2</i>   | 11   | Arfaptin2                                     | Cytoskeleton regulation                                    | Dysbindin                  | 16189514                      |
| 18   | <i>RGS7</i>     | 1    | regulator of G-protein signaling 7            | Signal transduction                                        | Snapin                     | 12659861                      |
| 19   | <i>FLJ10204</i> | 8    | C8ORF32 (hypothetical protein LOC55093)       |                                                            | Pallidin                   | 16189514                      |
| 20   | <i>MACF1</i>    | 1    | microtubule-actin crosslinking factor 1       | Cytoskeleton, actin binding                                | Dysbindin                  | 17043677                      |
| 21   | <i>DST</i>      | 6    | Dystonin (MACF2)                              | Cytoskeleton regulation                                    | Dysbindin                  | 17043677                      |
| 22   | <i>EPS8</i>     | 12   | epidermal growth factor receptor substrate 8  | Signal transduction                                        | Pallidin                   | 16189514                      |
| 23   | <i>RNF151</i>   | 16   | RNF151 (ring finger protein 151)              |                                                            | Dysbindin                  | 17577571                      |
| 24   | <i>C1orf190</i> | 1    | hypothetical protein LOC541468                |                                                            | Pallidin                   | 16189514                      |
| 25   | <i>TOR1A</i>    | 9    | torsinA                                       | AAA-type ATPase                                            | Snapin                     | 18167355                      |
| 26   | <i>PSME3</i>    | 17   | proteasome 3 (prosome, macropain)             | Immunoproteasome regulator                                 | Dysbindin                  | 17043677                      |
| 27   | <i>EBAG9</i>    | 8    | RCAS1                                         | Estrogen responsive gene, regulation of transcription      | Snapin                     | 15635093                      |
| 28   | <i>EEF1G</i>    | 11   | Eukaryotic Elongation factor 1 gamma          | Translation                                                | Snapin                     | 16169070                      |
| 29   | <i>PTN</i>      | 7    | pleiotrophin                                  | Cytokine, cell proliferation, development                  | BLOS1                      | 16169070                      |
| 30   | <i>BRD7</i>     | 16   | bromodomain containing 7                      | Histone binding, transcription factor                      | BLOS2                      | 18329849                      |
| 31   | <i>MET</i>      | 7    | receptor tyrosine kinase MET (TRP)            | Hepatocyte growth factor receptor                          | Snapin                     | 15546961                      |
| 32   | <i>GDA</i>      | 9    | cypin                                         | Guanine deamination                                        | Snapin                     | 16120643                      |
| 33   | <i>CJI-116</i>  | 12   | CCDC53 (coiled-coil domain containing 53)     |                                                            | Pallidin                   | 16189514                      |
| 34   | <i>KIF5C</i>    | 2    | kinesin family member 5                       | ATP binding, microtubule motor activity                    | Snapin                     | 16169070                      |
| 35   | <i>DDR1</i>     | 6    | discoidin domain receptor family, member 1    | Cell growth, communication and differentiation             | Snapin                     | 16169070                      |
| 36   | <i>KIAA0240</i> | 6    | hypothetical protein LOC23506                 |                                                            | Dysbindin                  | 17043677                      |
| 37   | <i>GPRASP1</i>  | X    | G protein-coupled receptor sorting 1          |                                                            | Snapin                     | 16169070                      |
| 38   | <i>SLC14A2</i>  | 18   | urea transporter, member 2                    | Renal tubular urea transporter                             | Snapin                     | 17702749                      |
| 39   | <i>DGCR6L</i>   | 22   | DiGeorge syndrome critical region gene 6 like | Cell migration                                             | Dysbindin                  | 16189514                      |
| 40   | <i>AGGF1</i>    | 5    | angiogenic factor VG5Q                        | Cell surface binding and cell adhesion                     | Pallidin                   | 16189514                      |
| 41   | <i>IKBKAP</i>   | 9    | IKAP                                          | Regulator of kinases involved in pro-inflammatory signal   | Snapin                     | 16169070                      |
| 42   | <i>ZNF490</i>   | 19   | zinc finger protein 490                       | Transcription factor                                       | Dysbindin                  | 17043677                      |
| 43   | <i>LAMC1</i>    | 1    | laminin, gamma 1                              | Cell adhesion, differentiation, neurite outgrowth          | Snapin                     | 16169070                      |
| 44   | <i>TRPM7</i>    | 15   | TRPM7                                         | Ion channel, kinase                                        | Snapin                     | 17088214                      |
| 45   | <i>DTNB</i>     | 2    | beta-dystrobrevin                             | Plasma membrane stability, signaling                       | Dysbindin, Muted           | 11316798                      |
| 46   | <i>CMYA5</i>    | 5    | myospryn/cardiomyopathy associated 5          |                                                            | Dysbindin                  | 14688250                      |
| 47   | <i>CCND3</i>    | 6    | cyclin D3                                     | Cell cycle regulation                                      | Dysbindin                  | 16189514                      |
| 48   | <i>TRPV1</i>    | 17   | vanilloid receptor-1 (TRPV1)                  | Receptor for capsaicin, transducer of pain stimulation     | Snapin                     | 15066994                      |
| 49   | <i>CCNA2</i>    | 4    | cyclinA2                                      | Cell cycle regulation                                      | Dysbindin                  | 17043677                      |
| 50   | <i>ADRA1A</i>   | 8    | alpha-1A-adrenergic receptor                  | G-coupled receptor, regulation of growth and proliferation | Snapin                     | 17684020                      |
| 51   | <i>DTNA</i>     | 18   | alpha-dystrobrevin                            | Plasma membrane stability, signaling                       | Dysbindin                  | 11316798                      |
| 52   | <i>CSF3R</i>    | 1    | colony stimulating factor 3 receptor          | Cytokine receptor                                          | Snapin                     | 16595180                      |
| 53   | <i>AKAP6</i>    | 14   | A kinase anchor protein 6 (PRKA)              | Binds the regulatory subunit of protein kinase A           | Dysbindin                  | 17043677                      |
| 54   | <i>HAP1</i>     | 17   | huntingtin-associated protein 1               | Protein/membrane trafficking or organelle transport        | Snapin                     | 16169070                      |
| 55   | <i>RyR1</i>     | 19   | ryanodine receptor type1                      | Calcium release channel in sarcoplasmic reticulum          | Snapin                     | 16723744                      |

**Rodriguez-Fernandez and Dell'Angelica  
Supplementary Table 2**

|    |                 |    |                                           |                                                       |           |          |
|----|-----------------|----|-------------------------------------------|-------------------------------------------------------|-----------|----------|
| 56 | <i>RyR2</i>     | 1  | ryanodine receptor type 2                 | Calcium channel in cardiac muscle                     | Snapin    | 16723744 |
| 57 | <i>RyR3</i>     | 15 | ryanodine receptor type 3                 | Calcium release channel                               | Snapin    | 16723744 |
| 58 | <i>IMMT</i>     | 2  | IMMT (Mittofilin)                         | Protein binding, mitochondria                         | Snapin    | 16169070 |
| 59 | <i>C10ORF78</i> | 10 | hypothetical protein LOC119392            | .                                                     | Dysbindin | 17043677 |
| 60 | <i>KIAA0408</i> | 6  | hypothetical protein LOC9729              | .                                                     | Dysbindin | 17043677 |
| 61 | <i>ABI3</i>     | 17 | NESH protein                              | Cell mobility                                         | Dysbindin | 16189514 |
| 62 | <i>ESF1</i>     | 20 | ABT1-associated protein                   | Regulation of transcription                           | Dysbindin | 17043677 |
| 63 | <i>HNF1A</i>    | 12 | HNF1 homeobox A                           | Transcription factor                                  | Snapin    | 16330323 |
| 64 | <i>BRF1</i>     | 14 | subunit of RNA polymerase III             | Transcription factor                                  | Dysbindin | 17043677 |
| 65 | <i>C18ORF24</i> | 18 | spindle and KT (kinetochore) associated 1 | Cell cycle                                            | Pallidin  | 16189514 |
| 66 | <i>SPAG5</i>    | 17 | sperm associated antigen 5                | Mitotic spindle, cell cycle, mitosis                  | Snapin    | 16169070 |
| 67 | <i>ADCY6</i>    | 12 | adenylate cyclase 6                       | cAMP catalysis                                        | Snapin    | 15319443 |
| 68 | <i>SYNE1</i>    | 6  | nesprin (Synaptic nuclear envelope p1)    | Localizes to nuclear membrane, spinocerebellar ataxia | Dysbindin | 17043677 |
| 69 | <i>TMEM27</i>   | X  | collectrin                                | Amino acid transport                                  | Snapin    | 16330323 |
| 70 | <i>KNTC2</i>    | 18 | kinetochore associated 2                  | Cell cycle                                            | Pallidin  | 16189514 |

**Footnotes:**

<sup>a</sup> As reported on either GeneOntology or the Summary section of NCBI Entrez Gene

<sup>b</sup> PMID, PubMed identification number: <http://www.ncbi.nlm.nih.gov/sites/entrez?db=pubmed>

**References:**

- 10195194 Ilardi JM, Mochida S, Sheng ZH (1999) Snapin: a SNARE-associated protein implicated in synaptic transmission. *Nat Neurosci* **2**:119-124.
- 10610180 Huang L, Kuo YM, Gitschier J (1999) The pallid gene encodes a novel, syntaxin 13-interacting protein involved in platelet storage pool deficiency. *Nat Genet* **23**:329-332.
- 11316798 Benson MA, Newey SE, Martin-Rendon E, Hawkes R, Blake DJ (2001) Dysbindin, a novel coiled-coil-containing protein that interacts with the dystrobrevins in muscle and brain. *J Biol Chem* **276**:24232-24241
- 12659861 Hunt RA, Edris W, Chanda PK, Nieuwenhuijsen B, Young KH (2003) Snapin interacts with the N-terminus of regulator of G protein signaling 7. *Biochem Biophys Res Commun* **303**:594-599
- 12877659 Buxton P, Zhang XM, Walsh B, Sriratana A, Schenberg I, Manickam E, Rowe T (2003) Identification and characterization of Snapin as a ubiquitously expressed SNARE-binding protein that interacts with SNAP23 in non-neuronal cells. *Biochem J* **375**:433-440.
- 14688250 Benson MA, Tinsley CL, Blake DJ (2004) Myospryn is a novel binding partner for dysbindin in muscle. *J Biol Chem* **279**:10450-10458.
- 15066994 Morenilla-Palao C, Planells-Cases R, Garcia-Sanz N, Ferrer-Montiel A (2004) Regulated exocytosis contributes to protein kinase C potentiation of vanilloid receptor activity. *J Biol Chem* **279**:25665-25672.
- 15319443 Chou JL, Huang CL, Lai HL, et al (2004) Regulation of type VI adenylyl cyclase by Snapin, a SNAP25-binding protein. *J Biol Chem* **279**:46271-46279.
- 15546961 Schaaf CP, Benzing J, Schmitt T, et al (2005) Novel interaction partners of the TPR/MET tyrosine kinase. *FASEB J* **19**:267-269.
- 15635093 Ruder C, Reimer T, Delgado-Martinez I, et al (2005) EBAG9 adds a new layer of control on large dense-core vesicle exocytosis via interaction with Snapin. *Mol Biol Cell* **16**:1245-1257.
- 16120643 Chen M, Lucas KG, Akum BF, et al (2005) A novel role for snapin in dendrite patterning: interaction with cypin. *Mol Biol Cell* **16**:5103-5114.
- 16169070 Stelzl U, Worm U, Lalowski M, et al (2005) A human protein-protein interaction network: a resource for annotating the proteome. *Cell* **122**:957-68.
- 16189514 Rual JF, Venkatesan K, Hao T, et al (2005) Towards a proteome-scale map of the human protein-protein interaction network. *Nature* **437**: 1173-1178.
- 16330323 Fukui K, Yang Q, Cao Y, et al (2005) The HNF-1 target collectrin controls insulin exocytosis by SNARE complex formation. *Cell Metab* **2**:373-384.
- 16595180 Yuan X, Shan Y, Zhao Z, Chen J, Cong Y (2006) Interaction between Snapin and G-CSF receptor. *Cytokine* **33**:219-225.
- 16723744 Zissimopoulos S, West DJ, Williams AJ, Lai FA (2006) Ryanodine receptor interaction with the SNARE-associated protein snapin. *J Cell Sci* **119**:2386-2397.
- 17043677 Camargo LM, Collura V, Rain JC, et al (2007) Disrupted in Schizophrenia-1 interactome: evidence for the close connectivity of risk genes and a potential synaptic basis for schizophrenia. *Mol Psychiatry* **12**: 74-86.
- 17088214 Krapivinsky G, Mochida S, Krapivinsky L, Cibulsky SM, Clapham DE (2006) The TRPM7 ion channel functions in cholinergic synaptic vesicles and affects transmitter release. *Neuron* **52**:395-397.
- 17101137 Wolff S, Stöter M, Giamas G, et al (2006) Casein kinase 1 delta (CK1delta) interacts with the SNARE associated protein snapin. *FEBS Lett* **580**:6477-84.
- 17552904 Felten A, Leister P, Burgdorf S, Uhlmann L, Scheidtmann KH (2007) Characterization of rat BLOS2/Ceap, a putative yeast She3 homolog, as interaction partner of apoptosis antagonizing transcription. *factor/Che-1. Biol Chem* **388**:569-582.
- 17577571 Nian H, Fan C, Liao S, et al (2007) RNF151, a testis-specific RING finger protein, interacts with dysbindin. *Arch Biochem Biophys* **465**:157-163.
- 17684020 Suzuki F, Morishima S, Tanaka T, Muramatsu I (2007) Snapin, a new regulator of receptor signaling, augments alpha1A-adrenoceptor-operated calcium influx through TRPC6. *J Biol Chem* **282**: 29563-29573.
- 17702749 Mistry AC, Mallick R, Fröhlich O, et al (2007) The UT-A1 urea transporter interacts with snapin, a SNARE-associated protein. *J Biol Chem* **282**:30097-30106.
- 17947242 Bao Y, Lopez JA, James DE, Hunziker W (2008) Snapin interacts with the Exo70 subunit of the exocyst and modulates GLUT4 trafficking. *J Biol Chem* **283**:324-331.
- 18167355 Granata A, Watson R, Collinson LM, Schiavo G, Warner TT (2008) The dystonia-associated protein torsinA modulates synaptic vesicle recycling. *J Biol Chem* **283**:7568-7579.
- 18329849 Sun J, Nie J, Hao B, et al (2008) Ceap/BLOS2 interacts with BRD7 and selectively inhibits its transcription-suppressing effect on cellular proliferation-associated genes. *Cell Signal* **20**:1151-1158.
- AFCS Alliance for Cellular Signaling, <http://www.afcs.org/>
