# Supplementary material
Source: PubMed Central journal article supplement (PMC2756288)
Supplement: NIHMS144031-supplement-Table_S3.pdf [file NIHMS144031-supplement-Table_S3.pdf]

Rodriguez-Fernandez and Dell'Angelica  
Supplementary Table 3

| Rank | Fly Gene name               | Chr. | Protein name (alternative name)            | Summary of reported/proposed function <sup>a</sup>         | Interacting BLOC-1 subunit  | Human Ortholog  |
|------|-----------------------------|------|--------------------------------------------|------------------------------------------------------------|-----------------------------|-----------------|
| 1    | <i>Cdic2</i> (CG5450)       | 2L   | Cytoplasmic dynein light chain 2           | ATPase microtubule-based motor activity                    | BLOS1                       | <i>DYNLL1</i>   |
| 2    | <i>endoB</i> (CG9834)       | 2R   | endophilin B                               | Membrane organization and biogenesis                       | BLOS2                       | <i>SH3GLB1</i>  |
| 3    | <i>Hrs</i> (CG2903)         | 2L   | HGF-regulated tyrosine kinase              | Protein/membrane trafficking, endosomes, synaptic vesicles | Dysbindin                   | <i>HGS</i>      |
| 4    | <i>aPKC</i> (CG10261)       | 2R   | Atypical protein kinase C                  | Protein kinase                                             | Dysbindin                   | <i>PRKIC</i>    |
| 5    | <i>usnp</i> (CG11173)       | 2R   | ubisnap, SNAP-29                           | Protein/membrane trafficking, membrane fusion              | BLOS2                       | <i>SNAP29</i>   |
| 6    | <i>CG14164</i>              | 3L   |                                            |                                                            | BLOS2                       | <i>LSM12</i>    |
| 7    | <i>CG2095</i>               | 3R   |                                            |                                                            | BLOS2                       | <i>EXOC4</i>    |
| 8    | <i>CG18449</i>              | 2R   |                                            |                                                            | Pallidin                    | ?               |
| 9    | <i>CG2774</i>               | 2L   |                                            | Cell communication, intracellular protein trafficking      | Pallidin                    | <i>SNX2</i>     |
| 10   | <i>CG10263</i>              | 2L   |                                            | Protein and zinc ion binding                               | Snapi                       | <i>CBLL1</i>    |
| 11   | <i>CG10681</i>              | 3L   |                                            |                                                            | BLOS1                       | <i>C19ORF50</i> |
| 12   | <i>Frq2</i> (CG5907)        | X    | Frequenin 2                                | Calcium ion binding, vesicle-mediated transport            | BLOS1                       | <i>FREQ</i>     |
| 13   | <i>CG17570</i>              | 2L   |                                            |                                                            | BLOS2                       | ?               |
| 14   | <i>drk</i> (CG6033)         | 2R   | downstream of receptor kinase              | Signal transduction, multiple functions                    | BLOS2                       | <i>GRB2</i>     |
| 15   | <i>CG15124</i>              | 2R   |                                            |                                                            | Cappucino                   | ?               |
| 16   | <i>CG9951</i>               | 3L   |                                            |                                                            | Dysbindin, BLOS2            | <i>CCDC22</i>   |
| 17   | <i>CG17599</i>              | X    |                                            |                                                            | Dysbindin                   | ?               |
| 18   | <i>RhoGAP92B</i> (CG4755)   | 3R   | RhoGAP92B                                  | GTPase activator, signal transduction                      | Dysbindin                   | <i>ARHGAP17</i> |
| 19   | <i>Stam</i> (CG6521)        | 2L   | Stam (Signal transducing adaptor molecule) | Synaptic vesicle endocytosis, involved in JAK-STAT cascade | Pallidin                    | <i>STAM</i>     |
| 20   | <i>CG14684</i>              | 3R   |                                            |                                                            | BLOS1                       | ?               |
| 21   | <i>CG4363</i>               | 2R   |                                            |                                                            | BLOS1                       | ?               |
| 22   | <i>CG11436</i>              | X    |                                            |                                                            | BLOS2                       | <i>TTC17</i>    |
| 23   | <i>kappaB-Ras</i> (CG1669)  | 2R   | kappaB-Ras                                 | GTP binding, regulation of NF-kappaB cascade               | BLOS2                       | <i>NKIRAS1</i>  |
| 24   | <i>alphaTub84B</i> (CG1913) | 3R   | alpha-Tubulin at 84B                       | GTP binding, structural constituent of cytoskeleton        | BLOS2                       | <i>TUBA1A</i>   |
| 25   | <i>CG10750</i>              | 2L   |                                            |                                                            | Dysbindin                   | <i>CCDC42</i>   |
| 26   | <i>CG9170</i>               | X    |                                            | Protein binding                                            | Dysbindin                   | <i>CEP164</i>   |
| 27   | <i>CG13474</i>              | 3L   |                                            |                                                            | Pallidin                    | ?               |
| 28   | <i>Cpr67Fa2</i> (CG18349)   | 3L   | Cuticular protein 67Fa2                    | Structural constituent of chitin-based cuticle             | BLOS2                       | ?               |
| 29   | <i>CG8736</i>               | 2R   |                                            |                                                            | BLOS2                       | ?               |
| 30   | <i>SIP3</i> (CG15468)       | X    | Syntaxin Interacting Protein 3             |                                                            | Dysbindin                   | ?               |
| 31   | <i>CG30428</i>              | 2R   |                                            |                                                            | Pallidin, BLOS2             | ?               |
| 32   | <i>Traf1</i> (CG3048)       | 2L   | TNF-receptor-associated factor 1           | Multiple functions                                         | Pallidin                    | <i>TRAF4</i>    |
| 33   | <i>CG15710</i>              | 2R   |                                            | Nucleic acid and zinc ion binding                          | Snapi                       | <i>PRDM4</i>    |
| 34   | <i>Bap60</i> (CG4303)       | X    | Brahma associated protein 60kD             | Transcription factor                                       | BLOS2, Snapi                | <i>SMARCD1</i>  |
| 35   | <i>CG3548</i>               | 2R   |                                            |                                                            | BLOS1                       | ?               |
| 36   | <i>CG5026</i>               | 3L   |                                            | Inositol or phosphatidylinositol phosphatase activity      | BLOS1                       | <i>MTMR9</i>    |
| 37   | <i>mub</i> (CG7437)         | 3L   | mushroom-body expressed                    | Regulation of alternative nuclear mRNA splicing            | BLOS1                       | <i>PCBP3</i>    |
| 38   | <i>dei</i> (CG5441)         | 3R   | delilah                                    | Transcription factor                                       | BLOS2                       | <i>ATOH1</i>    |
| 39   | <i>CG8831</i>               | 2R   |                                            | Nucleocytoplasmic transporter activity                     | Cappucino, Dysbindin, BLOS1 | <i>NUP54</i>    |
| 40   | <i>CG14556</i>              | 3R   |                                            |                                                            | Cappucino, Dysbindin, BLOS2 | ?               |
| 41   | <i>CG17265</i>              | 2L   |                                            |                                                            | Dysbindin, BLOS1            | <i>CCDC85A</i>  |
| 42   | <i>CG17778</i>              | X    |                                            |                                                            | Dysbindin, Pallidin         | ?               |
| 43   | <i>CG13476</i>              | 3L   |                                            |                                                            | Dysbindin, Pallidin, BLOS1  | ?               |
| 44   | <i>CG13085</i>              | 2L   |                                            |                                                            | Dysbindin                   | ?               |
| 45   | <i>CG17564</i>              | 2L   |                                            |                                                            | Dysbindin                   | <i>CLUAP1</i>   |
| 46   | <i>CG32809</i>              | X    |                                            | Nucleotide binding                                         | Dysbindin                   | <i>KIAA1217</i> |
| 47   | <i>ERR</i> (CG7404)         | 3L   | estrogen-related receptor                  | Transcription factor, nuclear receptor activity            | Dysbindin                   | <i>E5RRB</i>    |
| 48   | <i>l(1)G043</i> (CG14788)   | X    | lethal (1) G0431                           | GTP binding                                                | Pallidin                    | <i>LSG1</i>     |
| 49   | <i>sip1</i> (CG7238)        | 2L   | septin interacting protein 1               | Nucleic acid binding                                       | Pallidin                    | <i>TFIP11</i>   |
| 50   | <i>HLH4C</i> (CG3052)       | X    | Helix loop helix protein 4C                | Transcription factor                                       | Snapi                       | <i>HLH1</i>     |
| 51   | <i>CG6770</i>               | 2L   |                                            | Oxidative stress response                                  | Snapi                       | ?               |
| 52   | <i>CG7220</i>               | 2R   |                                            | Ubiquitin-protein ligase activity                          | Snapi                       | <i>UBE2W</i>    |
| 53   | <i>CG10466</i>              | 2L   |                                            | RNA binding                                                | BLOS2                       | <i>RBMX2</i>    |
| 54   | <i>Dox-A2</i> (CG10484)     | 2L   | Diphenol oxidase A2                        | Endopeptidase activity, phenol processing                  | BLOS2                       | <i>PSMD3</i>    |
| 55   | <i>CG32369</i>              | 3L   |                                            | ATP-dependent peptidase activity, ion and protein binding  | Dysbindin, BLOS2            | <i>LONRF3</i>   |
| 56   | <i>CG13032</i>              | 3R   |                                            |                                                            | Dysbindin                   | <i>CCDC13</i>   |
| 57   | <i>CG13993</i>              | 2L   |                                            |                                                            | Dysbindin                   | <i>PFDN1</i>    |

**Rodriguez-Fernandez and Dell'Angelica  
Supplementary Table 3**

|     |                              |    |                                 |                                                          |                  |                   |
|-----|------------------------------|----|---------------------------------|----------------------------------------------------------|------------------|-------------------|
| 58  | CG17744                      | 3L |                                 |                                                          | Dysbindin        | ?                 |
| 59  | <i>mbo</i> (CG6819)          | 3R | mbo, members only               | Immunity, nuclear export/import, nucleoporin             | Dysbindin        | <i>NUP88</i>      |
| 60  | CG7242                       | 3R | lethal (3) c00064               |                                                          | Dysbindin        | ?                 |
| 61  | CG8851                       | 2L |                                 |                                                          | Dysbindin        | ?                 |
| 62  | CG5053                       | 3R |                                 |                                                          | Pallidin         | <i>RASSF8</i>     |
| 63  | CG9418                       | 2R |                                 | DNA binding, regulation of transcription                 | Pallidin         | <i>HMG20A</i>     |
| 64  | CG14534                      | 2L |                                 | Nutrient reservoir activity                              | Snapin           | ?                 |
| 65  | <i>RpS20</i> (CG15693)       | 3R | Ribosomal protein S20           | Translation, structural component of ribosome            | Snapin           | <i>RPS20</i>      |
| 66  | <i>par-1</i> (CG30131)       | 2R | par-1                           | Multiple function, humoral response and ovum development | Snapin           | <i>MARK3</i>      |
| 67  | <i>tsr</i> (CG4254)          | 2R | Twinstar, ADFcofilin, Cofilin   | Actin binding                                            | Snapin           | ?                 |
| 68  | <i>stau</i> (CG5753)         | 2R | staufen                         | RNA binding                                              | Snapin           | <i>STAU1</i>      |
| 69  | CG8206                       | X  |                                 |                                                          | Snapin           | <i>DNLZ</i>       |
| 70  | <i>TpnC4</i> (CG12408)       | 2R | TpnC4                           | Calcium ion binding, ciliary or flagellar motility       | BLOS2            | ?                 |
| 71  | CG8907                       | 3R |                                 |                                                          | BLOS2            | <i>EPS8L2</i>     |
| 72  | CG13434                      | 2R |                                 | Chromosome segregation                                   | Dysbindin        | ?                 |
| 73  | <i>Srp68</i> (CG5064)        | 3L | Srp68                           | RNA binding, SRP dependent, co-translational protein     | Dysbindin        | <i>SRP68</i>      |
| 74  | CG6156                       | 3R |                                 |                                                          | Dysbindin        | <i>MCC</i>        |
| 75  | CG7386                       | 3L |                                 | Metallopeptidase, nucleic acid binding                   | Dysbindin        | <i>LOC730087</i>  |
| 76  | <i>Ag5r2</i> (CG9540)        | X  | Antigen 5-related 2             |                                                          | Pallidin         | ?                 |
| 77  | CG4830                       | 3R |                                 | Long-chain fatty acid transporter, metabolism            | Snapin           | ?                 |
| 78  | <i>Argk</i> (CG32031)        | 3L | Arginine kinase                 | Arginine kinase                                          | BLOS1            | ?                 |
| 79  | <i>nop5</i> (CG10206)        | 2L | nop5                            | Ribosomal RNA processing                                 | BLOS2            | <i>NOP5/NOP58</i> |
| 80  | CG11698                      | 3R |                                 |                                                          | BLOS2            | ?                 |
| 81  | CG12589                      | 3R |                                 |                                                          | BLOS2            | ?                 |
| 82  | CG13005                      | X  |                                 |                                                          | BLOS2            | ?                 |
| 83  | CG13067                      | 3L |                                 |                                                          | BLOS2            | ?                 |
| 84  | CG15152                      | 2L |                                 |                                                          | BLOS2            | ?                 |
| 85  | <i>crc</i> (CG8669)          | 2L | cryptocephal                    | Transcription factor                                     | BLOS2            | <i>ATF4</i>       |
| 86  | CG14928                      | 2L |                                 |                                                          | Dysbindin, BLOS1 | ?                 |
| 87  | CG14071                      | 2L |                                 |                                                          | Dysbindin, BLOS2 | ?                 |
| 88  | <i>crn</i> (CG3193)          | X  | Crooked neck, yolky             | Malpighian tubule morphogenesis, development             | Dysbindin        | <i>CRNKL1</i>     |
| 89  | <i>CkIIalpha-i3</i> (CG3217) | 3L | CKII-alpha subunit interactor-3 |                                                          | Dysbindin        | ?                 |
| 90  | CG6905                       | 3L |                                 | DNA binding, RNA splicing factor, spliceosome            | Dysbindin        | <i>CDC5L</i>      |
| 91  | <i>Ef1alpha48D</i> (CG8280)  | 2R | Elongation factor 1alpha48D     | GTP binding, translation                                 | Pallidin         | <i>EEF1A1</i>     |
| 92  | <i>Art7</i> (CG9882)         | 2R | Arginine methyltransferase 7    | Methyltransferase                                        | Pallidin         | <i>PRMT7</i>      |
| 93  | CG7757                       | 3L |                                 | Nuclear mRNA splicing                                    | Snapin           | <i>PRPF3</i>      |
| 94  | <i>trsn</i> (CG11761)        | 2R | translin                        | DNA binding                                              | Dysbindin        | <i>TSN</i>        |
| 95  | <i>Mnt</i> (CG13316)         | X  | Mnt                             | DNA binding, phagocytosis, regulation of transcription   | Dysbindin        | <i>MNT</i>        |
| 96  | CG6569                       | 3R |                                 |                                                          | Dysbindin        | ?                 |
| 97  | <i>cnn</i> (CG4832)          | 2R | centrosomin                     | Microtubule binding, nuclear division                    | BLOS1            | ?                 |
| 98  | CG2930                       | X  |                                 | Proton-dependent oligopeptide, transmembrane transporter | Dysbindin        | <i>SLC15A2</i>    |
| 99  | CG18528                      | 3R |                                 | GTP binding, tRNA modification                           | BLOS2            | <i>GTPBP3</i>     |
| 100 | CG5933                       | 3R |                                 | Methyltransferase                                        | Dysbindin        | <i>METTL3</i>     |
| 101 | <i>rad50</i> (CG6339)        | 2R | rad50                           | DNA repair, chromosome organization and biogenesis       | Dysbindin        | <i>RAD50</i>      |
| 102 | CG3726                       | X  |                                 | Transcription factor                                     | BLOS2            | ?                 |

**Footnotes:**

<sup>a</sup> As reported on either GeneOntology or the Summary section of NCBI Entrez Gene

**References:**

(For *HRS* and *rad50*):

PMID = 15710747 Formstecher E, Aresta S, Collura V, Hamburger A, et al (2005) Protein interaction mapping: a *Drosophila* case study. *Genome Res* **15**:376-384.

(For all other candidates):

PMID = 14605208 Giot L, Bader JS, Brouwer C, et al (2003) A protein interaction map of *Drosophila melanogaster*. *Science* **302**:1727-36.
